# Supplementary material for: Chemical vapor deposition of clean and pure MoS2 crystals by the inhibition of MoO3−x intermediates
Source: Royal Society of Chemistry journal article supplement (doi:10.1039/d0ce01354d), 2020-11-05
Supplement: d0ce01354d1.pdf [file d0ce01354d1.pdf]

## Supporting Information

### **Chemical Vapor Deposition of Clean and Pure MoS<sub>2</sub> Crystals by Inhibition of MoO<sub>3-x</sub> Intermediates**

*Ran Guan<sup>†</sup>, Junxi Duan<sup>\* §</sup>, Aiheng Yuan<sup>†</sup>, Zhoufan Wang<sup>†</sup>, Shuai Yang<sup>†</sup>, Luoqiao Han<sup>†</sup>, Bo Zhang<sup>†</sup>, Dejun Li<sup>†</sup>, and Birong Luo<sup>\* †</sup>*

<sup>†</sup>College of Physics and Materials Science, Tianjin Normal University, 300387

Tianjin, P. R. China.

<sup>§</sup>School of Physics, Beijing Institute of Technology, 100081 Beijing, P. R. China.

\* Corresponding Author

E-mail: [bluo@tjnu.edu.cn](mailto:bluo@tjnu.edu.cn); [6120170107@bit.edu.cn](mailto:6120170107@bit.edu.cn)

**Table S1.** Summary of Raman characterization of MoS<sub>2</sub> and MoO<sub>3-x</sub>/MoS<sub>2</sub> composites.

| Sample No. | Heating rate of S (°C/min) | Raman peaks for MoS <sub>2</sub> (cm <sup>-1</sup> )        | A <sub>1g</sub> - E <sub>2g</sub> <sup>1</sup> (Δ k) (cm <sup>-1</sup> ) | Raman peaks for MoO <sub>2</sub> and/or MoOS <sub>2</sub> (cm <sup>-1</sup> ) |
|------------|----------------------------|-------------------------------------------------------------|--------------------------------------------------------------------------|-------------------------------------------------------------------------------|
| 1          | 1                          | E <sub>2g</sub> <sup>1</sup> : 381<br>A <sub>1g</sub> : 408 | 27                                                                       | 128, 204, 230, 344, 361, 494, 566, 741                                        |
| 2          | 5                          | E <sub>2g</sub> <sup>1</sup> : 382<br>A <sub>1g</sub> : 405 | 23                                                                       | 124, 204, 227, 494, 566, 742                                                  |
| 3          | 8                          | E <sub>2g</sub> <sup>1</sup> : 381<br>A <sub>1g</sub> : 402 | 21                                                                       |                                                                               |

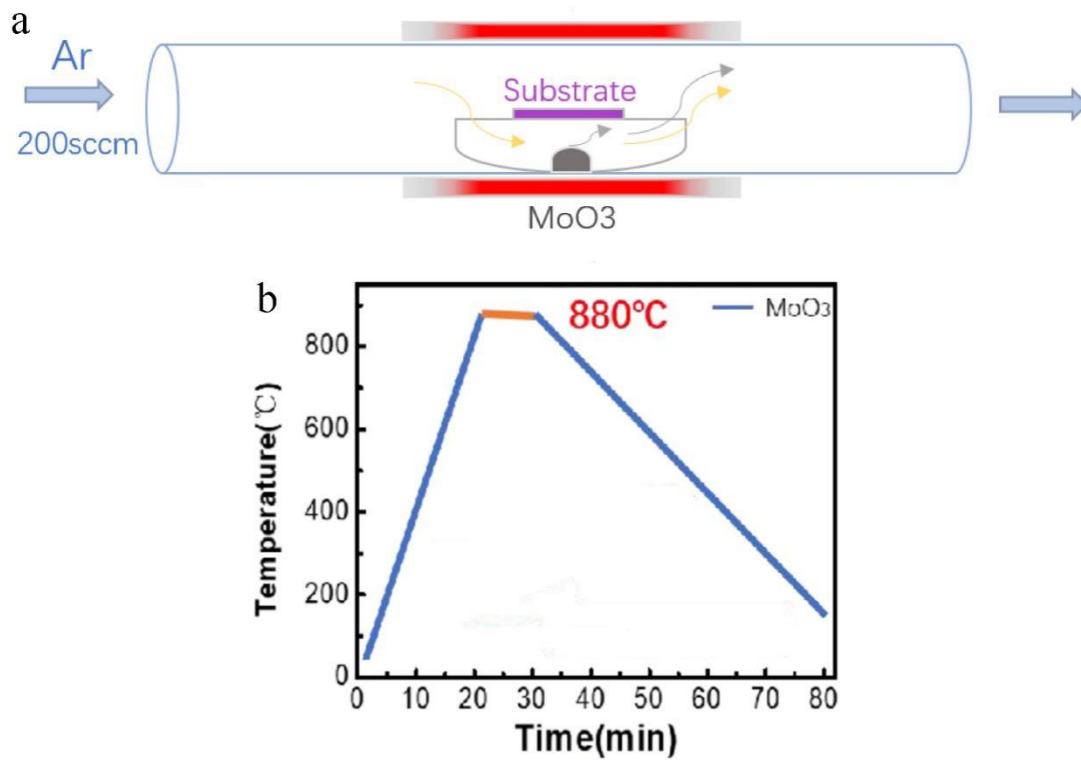

**Figure S1.** (a) Schematic diagram of the CVD setup for the S-free growth which has only high temperature zone. (b) Temperature ramping processes of the MoO<sub>3</sub> precursor as a function of time.

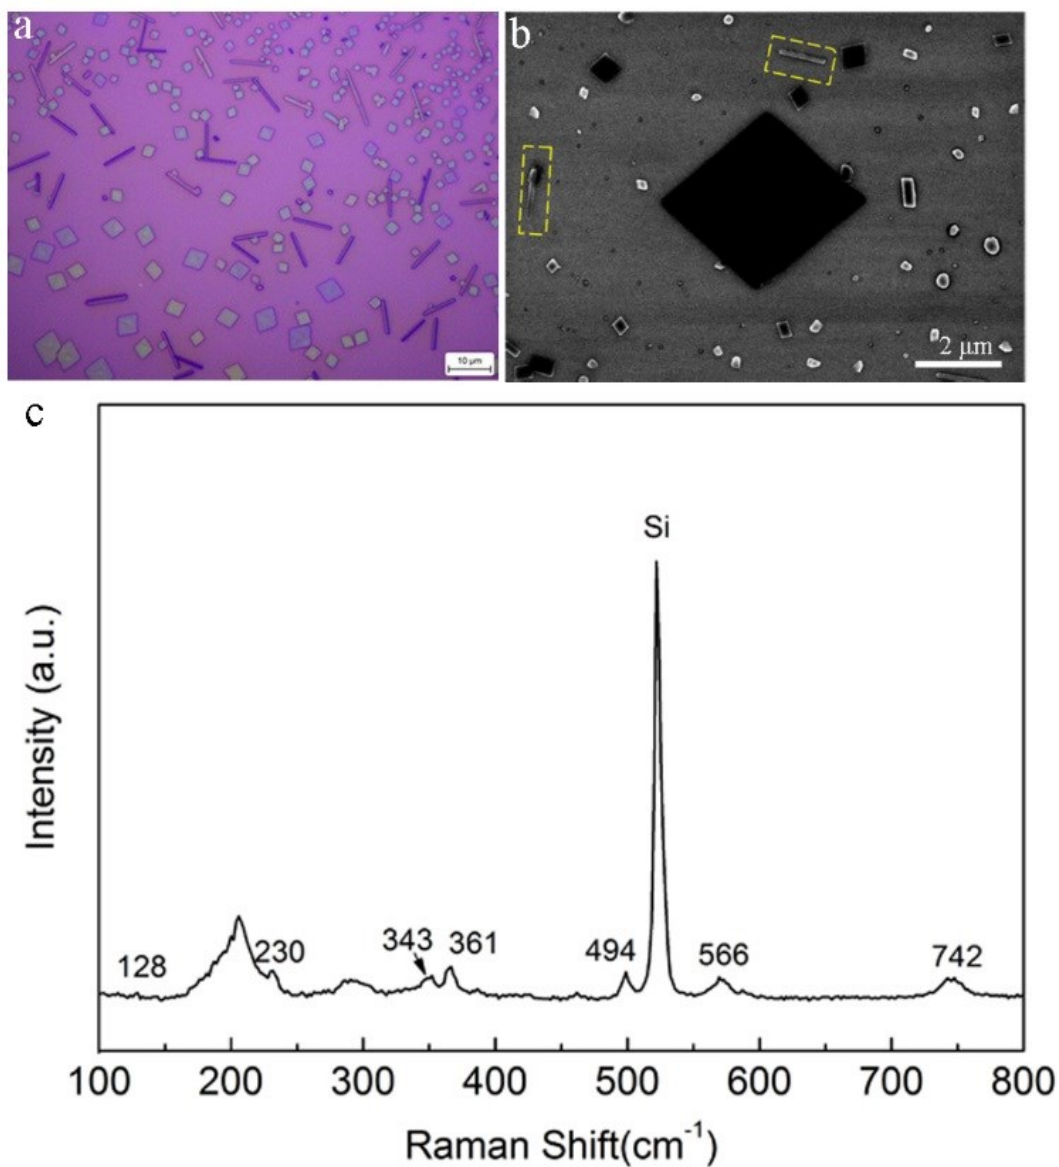

**Figure S2.** (a) Optical image of quadrilateral and striped shapes of products grown without S precursor. (b) Enlarged SEM image of quadrilateral and striped shapes of products grown without S precursor. (c) Raman spectra of a typical quadrilateral product grown without S precursor, showing obvious Raman characteristics of  $\text{MoO}_2$ .

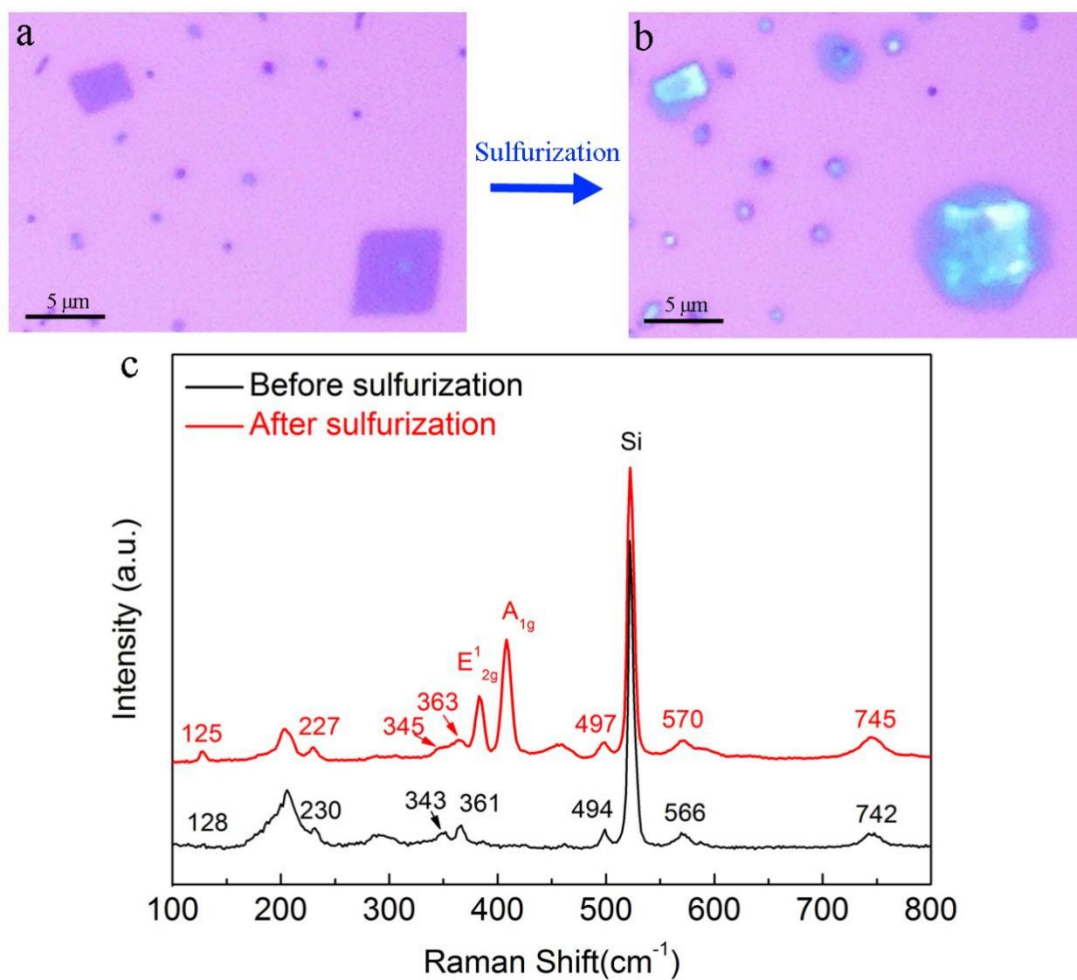

**Figure S3.** (a) Optical image of quadrilateral CVD products grown before S sulfurization and (b) after sulfurization. (c) The corresponding Raman spectra of quadrilateral CVD products grown before sulfurization and after sulfurization.

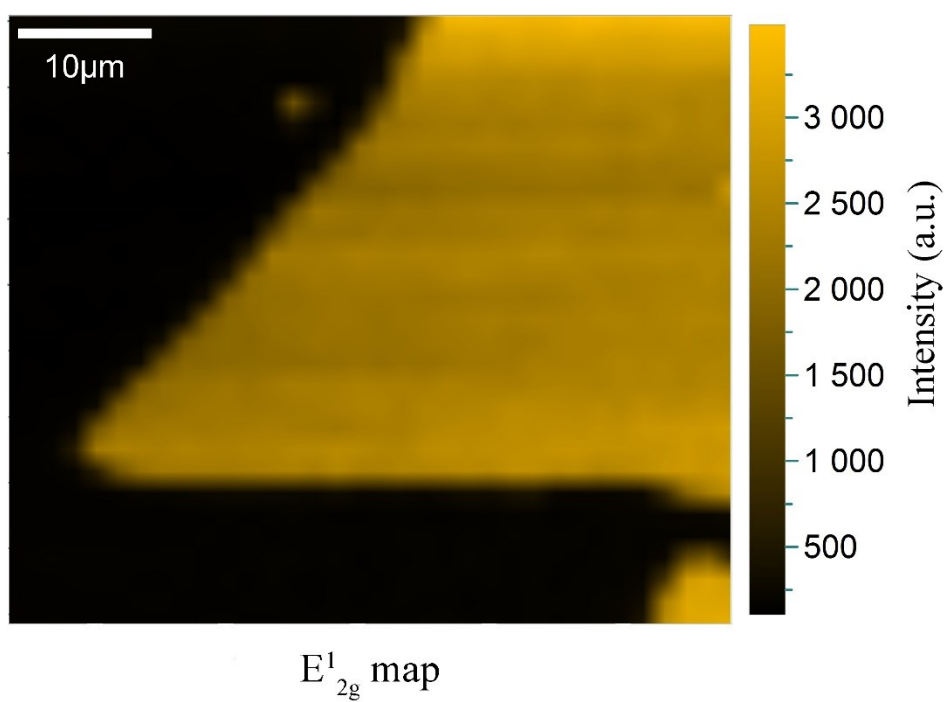

**Figure S4.** The  $E_{2g}^1$  intensity Raman map corresponding to the corner area of the clean and pure  $\text{MoS}_2$  grain shown in the up right of Figure 4a.

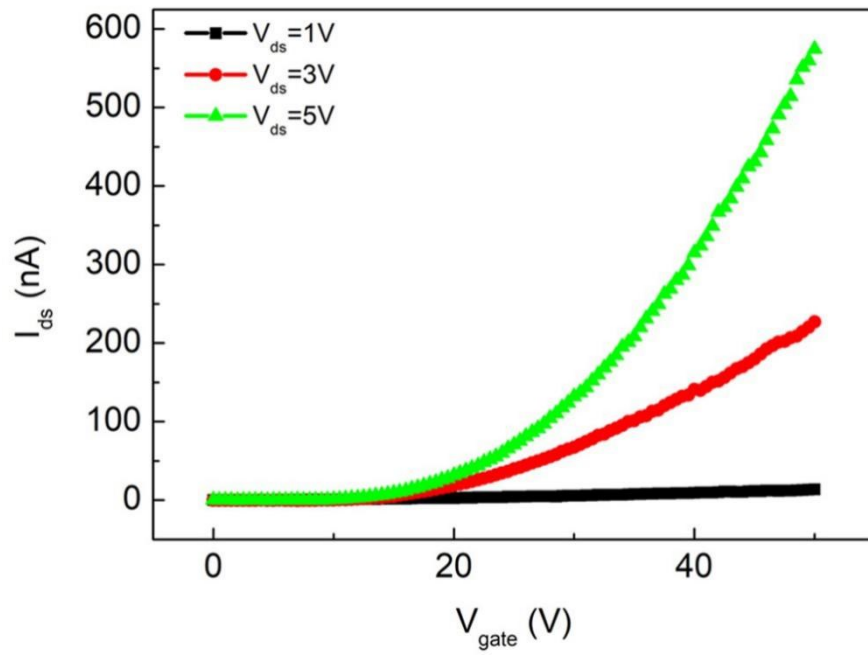

**Figure S5.** Transfer characteristics curves ( $I_{ds}$ - $V_{gate}$ ) of the FET device based on clean and pure MoS<sub>2</sub> at 1, 3, and 5V S-D voltage, respectively.
